# Supplementary material for: Peptaibol Production and Characterization from Trichoderma asperellum and Their Action as Biofungicide
Source: MDPI journal article supplement (doi:10.3390/jof8101037), 2022-09-29
Supplement: s1 [file s1]

## Supplementary Materials

**Table S1.** Absolute and relative abundance of the most common amino acids in the sequence of *Paib* produced by *Trichoderma* species

| Aminoacid          | Absolute abundance | Relative abundance (%) |
|--------------------|--------------------|------------------------|
| Aib                | 1156               | 36.9                   |
| Leucine/Isoleucine | 465                | 14.8                   |
| Glutamine          | 319                | 10.2                   |
| Valine/Isovaline   | 305                | 9.7                    |
| Alanine            | 282                | 9.0                    |
| Proline            | 261                | 8.3                    |
| Glycine            | 145                | 4.6                    |
| Phenylalanine      | 72                 | 2.3                    |
| Serine             | 43                 | 1.4                    |
| Asparagine         | 38                 | 1.2                    |
| Glutamate          | 32                 | 1.0                    |
| Tryptophan         | 10                 | 0.3                    |
| Others             | 8                  | 0.3                    |
| Total              | 3136               | 100                    |

Source: based in the information reported at the  $P_{aib}$  Database [55]

**Table S2.** Regression coefficients and probabilities associated with the factors in the model for predicting the production of  $P_{aib}$ .

| Factor                              | Coefficient | Probability |
|-------------------------------------|-------------|-------------|
| Constant                            | 4.05E+08    | <0.001*     |
| Aib (A)                             | 4.28E+08    | 0.0002*     |
| <i>F. oxysporum</i> (F)             | -4.51E+08   | 0.7637      |
| Interaction (A-F)                   | -2.85E+07   | 0.4842      |
| Aib quadratic (A-A)                 | -5.78E+07   | 0.0887      |
| <i>F. oxysporum</i> quadratic (F-F) | 1.45E+08    | 0.0016*     |

\*Indicates the variable has a significative effect over the observed response ( $P < 0.05$ ).
